# Supplementary material for: Single-cell transcriptomics analysis of bullous pemphigoid unveils immune-stromal crosstalk in type 2 inflammatory disease
Source: PubMed Central journal article supplement (PMC11251189; doi:10.1038/s41467-024-50283-3), 2024-07-15
Supplement: 41467_2024_50283_MOESM1_ESM.pdf [file 41467_2024_50283_MOESM1_ESM.pdf]

# **Single-cell transcriptomics analysis of bullous pemphigoid unveils immune-stromal crosstalk in type 2 inflammatory disease**

Tingting Liu<sup>1,2,6</sup>, Zhenzhen Wang<sup>1,2,3,6</sup>, Xiaotong Xue<sup>1,2</sup>, Zhe Wang<sup>1,2</sup>, Yuan Zhang<sup>1,2</sup>, Zihao Mi<sup>1,2</sup>, Qing Zhao<sup>1,2</sup>, Lele Sun<sup>1,2</sup>, Chuan Wang<sup>1,2</sup>, Peidian Shi<sup>1,2</sup>, Gongqi Yu<sup>1,2</sup>, Meng Wang<sup>1,2</sup>, Yonghu Sun<sup>1,2</sup>, Fuzhong Xue<sup>3</sup>, Hong Liu<sup>1,2,5\*</sup>, Furen Zhang<sup>1,2,4,5\*</sup>

<sup>1</sup>Hospital for Skin Diseases, Shandong First Medical University, Jinan, Shandong, China

<sup>2</sup>Shandong Provincial Institute of Dermatology and Venereology, Shandong Academy of Medical Sciences, Jinan, Shandong, China

<sup>3</sup>Department of Biostatistics, School of Public Health, Cheeloo College of Medicine, Shandong University, Jinan, Shandong, China;

<sup>4</sup>Shandong University of Traditional Chinese Medicine, Jinan, Shandong, China;

<sup>5</sup>School of Public Health, Shandong First Medical University and Shandong Academy of Medical Sciences, Jinan, Shandong, China.

<sup>6</sup>These authors contributed equally: Tingting Liu and Zhenzhen Wang.

\*Corresponding author, these authors jointly supervised this work: Furen Zhang and Hong Liu.

Furen Zhang, MD, PhD

27397, Jingshi Rd, Jinan City, Shandong, China.

Phone: +86-053187298801

E-mail: [zhangfuren@hotmail.com](mailto:zhangfuren@hotmail.com);

Hong Liu, MD, PhD

27397, Jingshi Rd, Jinan City, Shandong, China.

Phone: +86-053187298870

E-mail: [hongyue2519@hotmail.com](mailto:hongyue2519@hotmail.com)

## Supplementary information

Supplementary Fig. 1 The quality and clustering of the skin scRNA-seq data.

Supplementary Fig. 2 Sub-clustering of the skin immune cluster.

Supplementary Fig. 3 Sub-clustering of the fibroblasts and keratinocytes clusters.

Supplementary Fig. 4 The expression and role of PLA2G2A.

Supplementary Fig. 5 All the significant ligand-receptor pairs that contribute to the signaling sending from fibroblast sub-populations to other subsets by CellChat analysis.

Supplementary Fig. 6 The expression profile of *CXCL12* and *CXCR4* in skin cells.

Supplementary Fig. 7 The analysis of significant mean top50 interacting pair from Th2 and Proliferating T cells by CellPhoneDB.

Supplementary Fig. 8 The expression profile of *CCL17* and *CCR4* in immune cells.

Supplementary Fig. 9 PLA2G2A and CCL17 elevate the frequency of plasma cells.

Supplementary Fig. 10 The quality of PBMC and blister samples, as well as the identification of clusters within PBMC samples.

Supplementary Fig. 11 The Dot plot of the signature genes of PBMC clusters and the distribution of clusters within the PBMC samples.

Supplementary Fig. 12 The distribution of clusters in blister samples and the *IL13-IL13RA1* ligand-receptor pair in PBMCs and blister.

Supplementary Fig. 13 *CCL17-CCR4* ligand-receptor pair in PBMC and blister.

Supplementary Fig. 14 *CCL19-CCR7* ligand-receptor pair in skin and blister samples.

Supplementary Fig. 15 The gating strategy of T cells and B cells to test the expression of CXCR4, CCR4 and CD138.

Supplementary Table 1 The sample information included in the study.

Supplementary Table 2 The detailed information of antibodies used in the study.

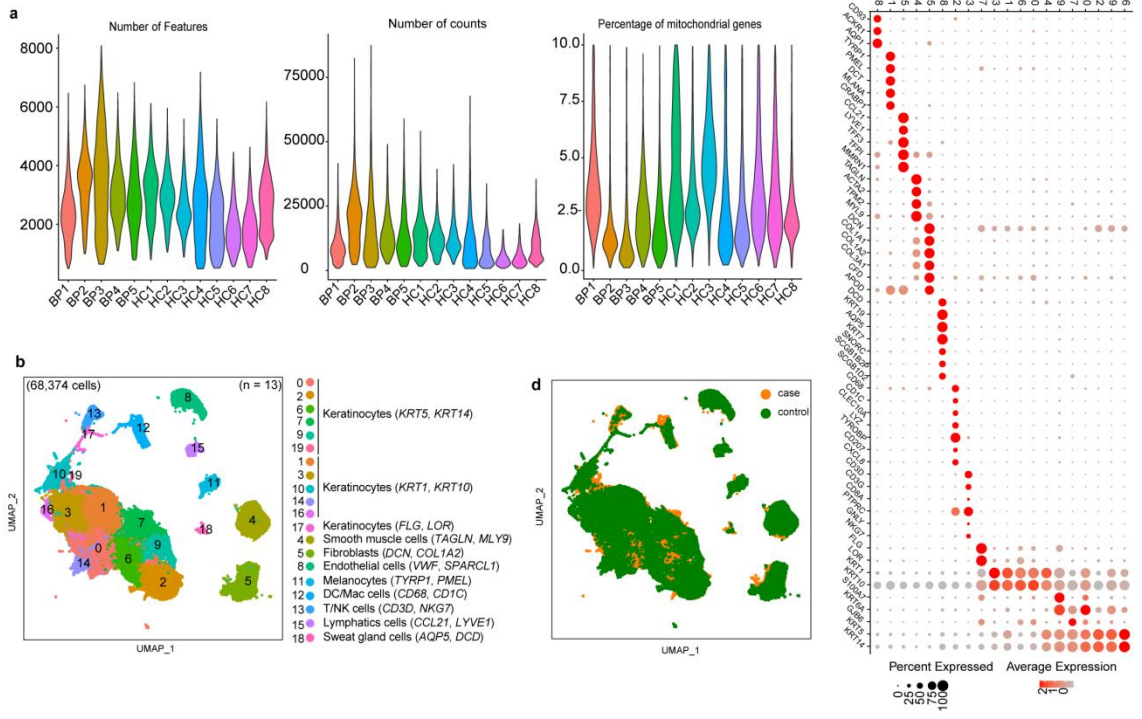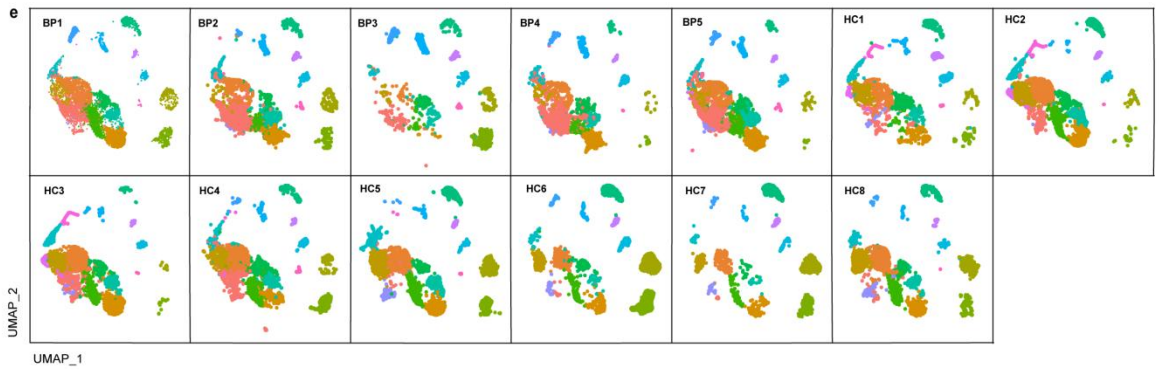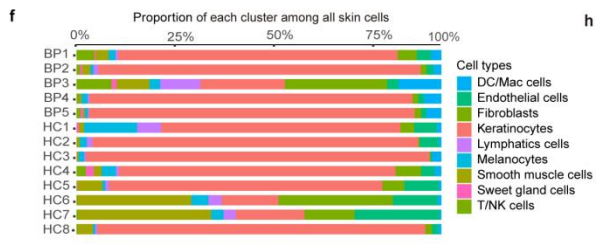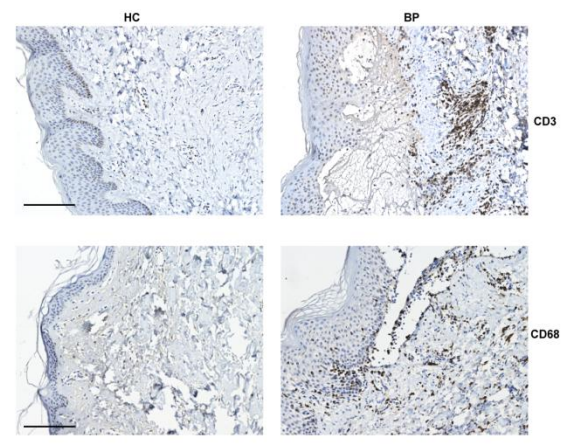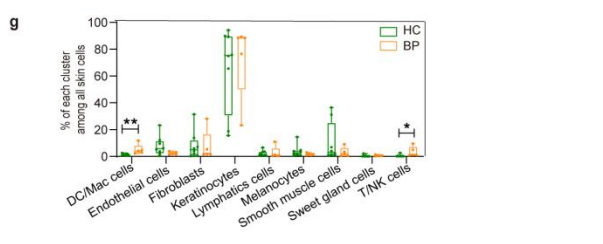

### **Supplementary Fig. 1 The quality and clustering of the skin scRNA-seq data**

**a** Violin plots illustrating the quality control metrics used in the scRNA-seq analysis for each skin sample's features, counts, and mitochondrial percentage per cell. **b** UMAP plot for 68,374 cells from skin samples of the discovery cohort, the signature genes for each cell type were indicated in parentheses. **c** Dot plot of the signature genes for the identification of major skin cell types. **d** UMAP plot for skin cells split by bullous pemphigoid (BP) and healthy controls (HC). Cells from BP patients are shown in orange, whereas cells from HC are shown in green. **e** UMAP plot for skin cells split by each sample. **f** Bar plots illustrate the relative contributions of skin cell types in each sample. **g** Comparison of the percentage of each cell type in all skin cells between BP patients and HC. Each dot represented a donor. BP patients ( $n = 5$ ) and HC ( $n = 8$ ).  $P$ -values were calculated using two-sided Mann-Whitney U-test where  $** = P\text{-value} = 0.005$  and  $* = P\text{-value} = 0.013$ , only  $P\text{-values} < 0.05$  are shown. Minima: Lower limit of the whisker. Maxima: Upper limit of the whisker. Centre: Median line inside the box. The upper and lower box bounds represent the 25% and 75% percentile of data. **h** Immunohistochemistry staining showing the increase of CD3<sup>+</sup> T cells and CD68<sup>+</sup> macrophages within the lesion of BP patients. Scale bar = 150  $\mu\text{m}$ . Data are from at least three independent experiments in **h**.

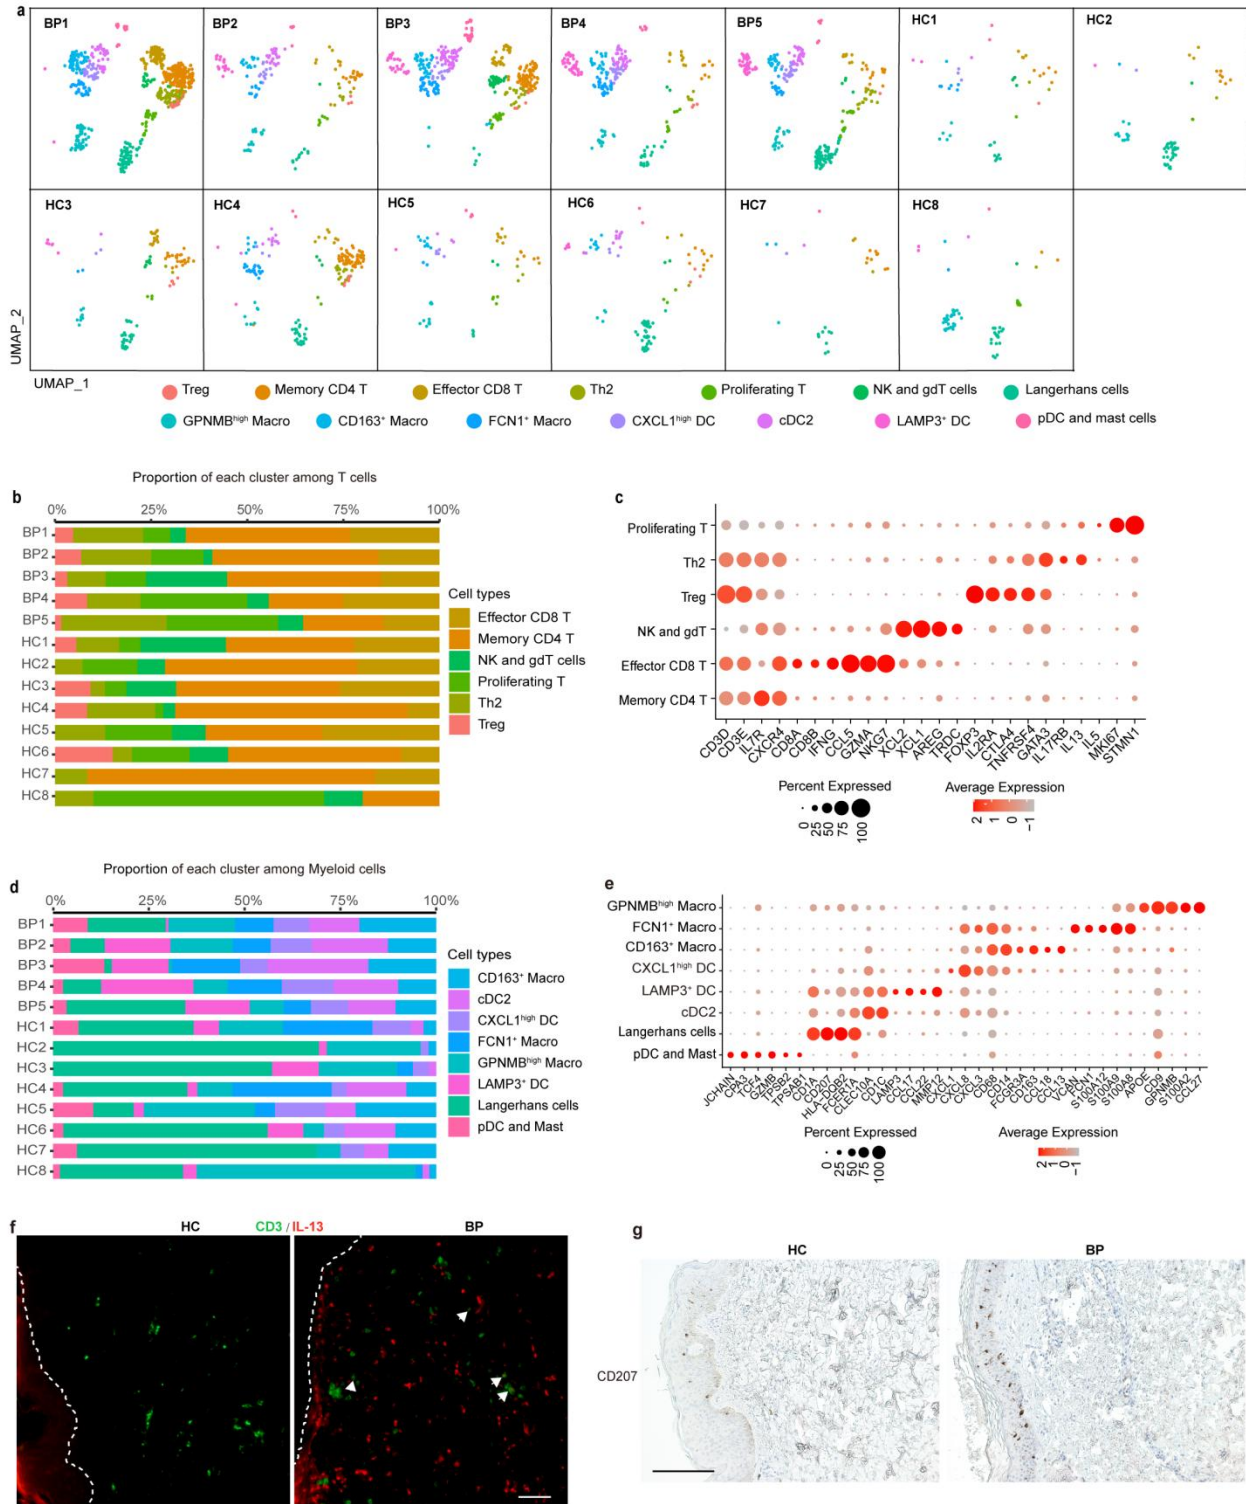

**Supplementary Fig. 2 Sub-clustering of the skin immune cluster.**

**a** UMAP plot for skin immune cells split by each sample. **b** Bar plots illustrate the relative contributions of skin T cell types in each sample. **c** Expressions of major discriminative marker

genes in skin T cells. **d** Bar plots illustrate the relative contributions of skin myeloid cell types in each sample. **e** Expressions of major discriminative marker genes in skin myeloid cells. **f** Immunofluorescence co-staining of IL-13 and CD3 further confirmed the increase of Th2 cells in BP lesions, scale bar = 50  $\mu\text{m}$ . **g** The immunochemistry stainings show the infiltration of Langerhans cells, scale bar = 150  $\mu\text{m}$ . Data are from at least three independent experiments in **f** and **g**.



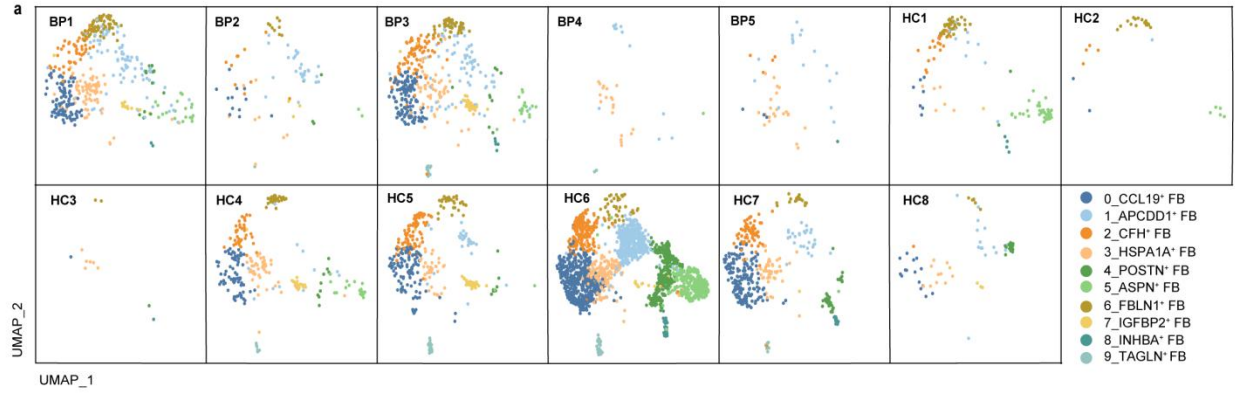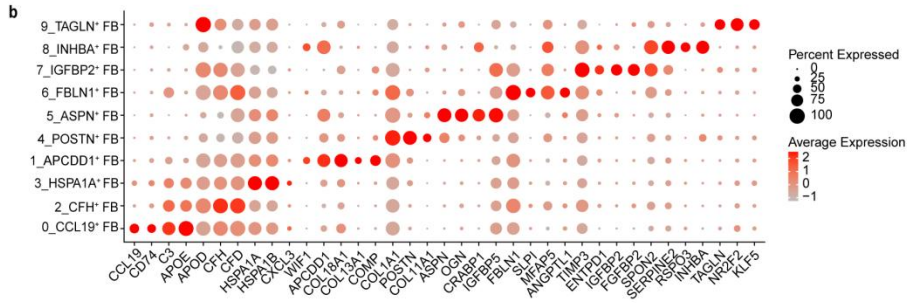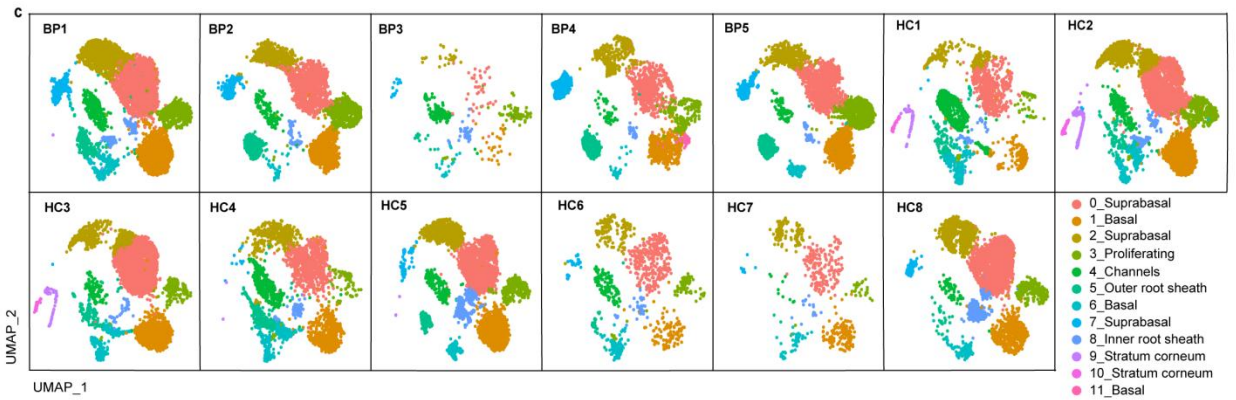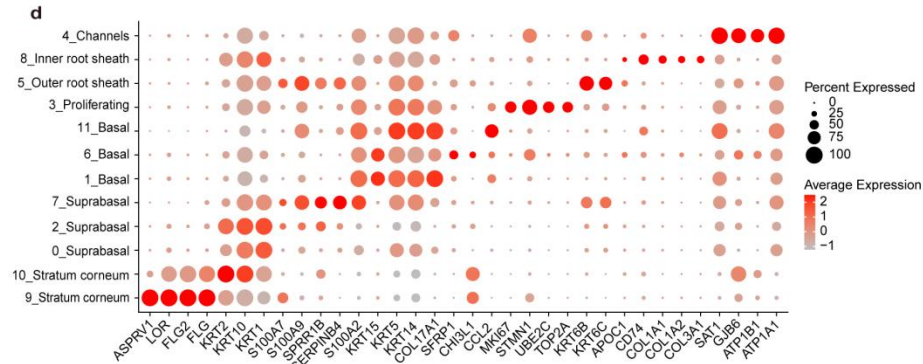

**Supplementary Fig. 3 Sub-clustering of the fibroblasts and keratinocytes clusters.**

**a** UMAP plot for fibroblasts sub-clustering split by each sample. **b** Expressions of major discriminative marker genes in fibroblasts sub-clustering. **c** UMAP plot for keratinocytes sub-clustering split by each sample. **d** Expressions of major discriminative marker genes in keratinocytes sub-clustering.



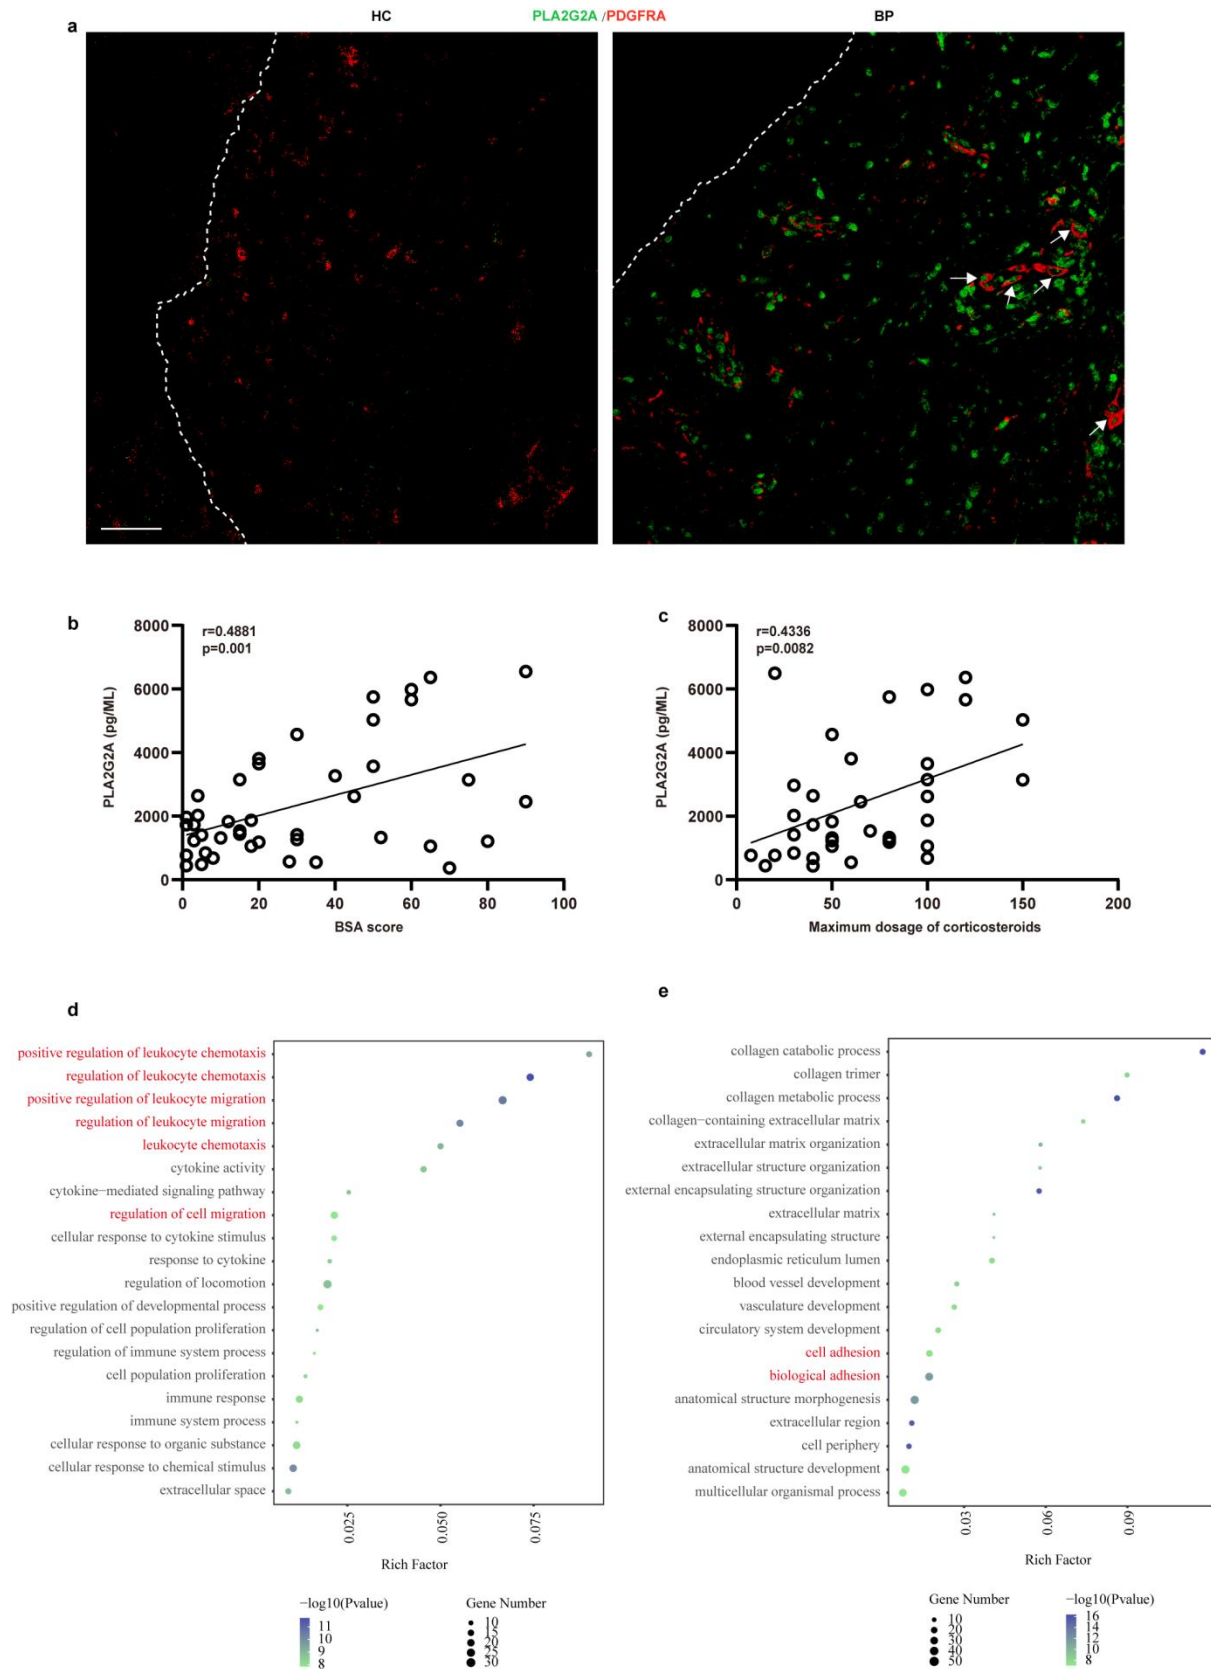

**Supplementary Fig. 4 The expression and role of PLA2G2A.**

**a** Immunofluorescence co-staining of fibroblast marker PDGFRA and PLA2G2A showing the elevation of PLA2G2A in fibroblasts from BP lesions, scale bar = 50  $\mu\text{m}$ . **b** The positive correlation between the level of serum PLA2G2A and BSA score in BP patients (n = 42). **c** The positive correlation between serum PLA2G2A and the maximum dosage of corticosteroids in BP patients (n = 36). *P*-values in **b** and **c** were calculated using two-sided Pearson correlation test. *r*-values were Pearson correlation coefficients. **d** The enrichment of positive regulation of leukocyte chemotaxis, positive regulation of leukocyte migration and regulation of cell migration in *CCL19*<sup>+</sup> FB cells. **e** The enrichment of cell adhesion and biological adhesion in *APCDD1*<sup>+</sup> FB cells. The correlations in **b** and **c** were measured using the Pearson correlation coefficient. Data are from at least three independent experiments in **a**.

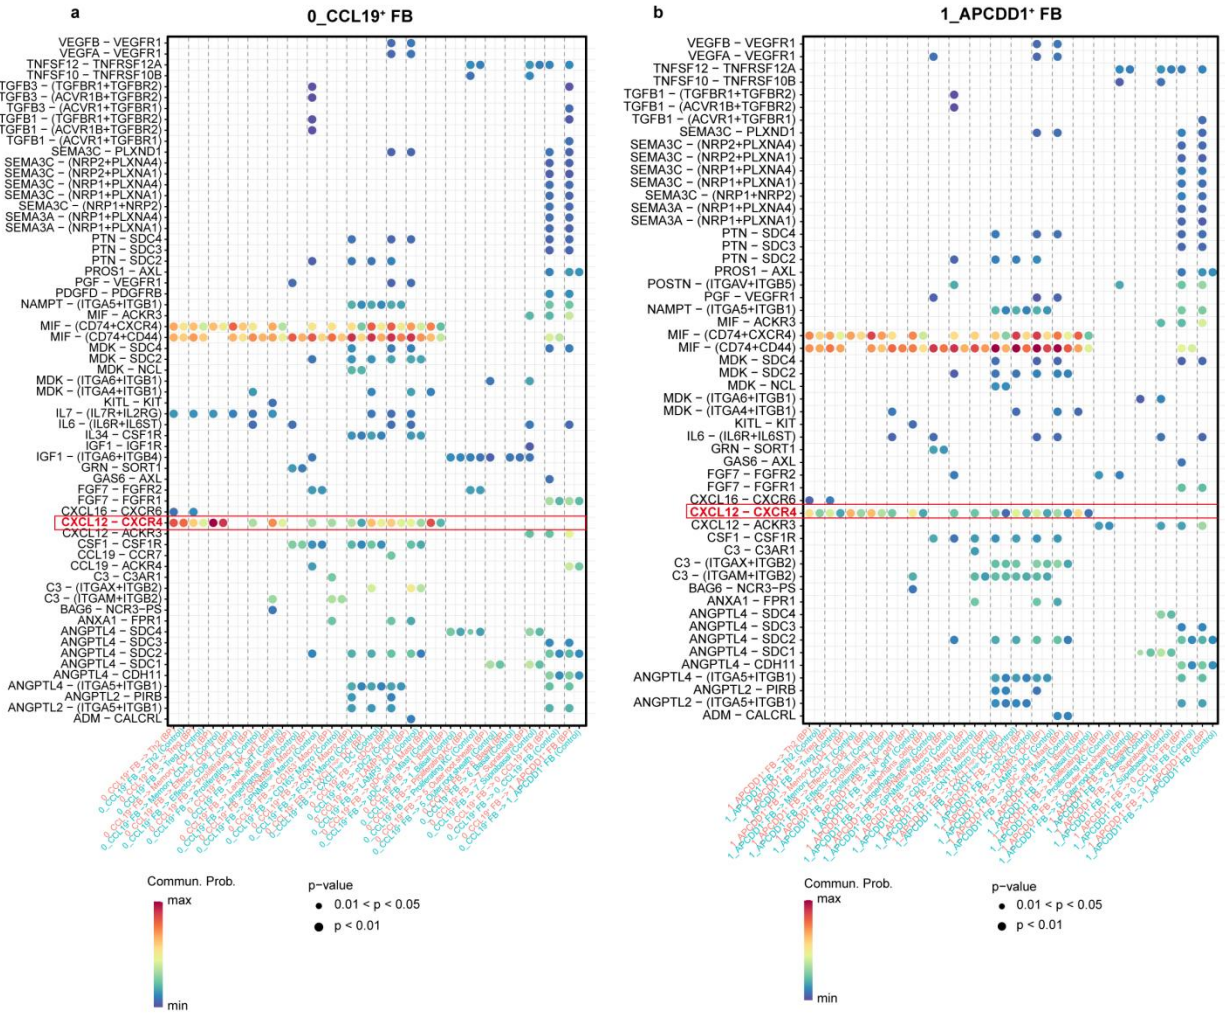

**Supplementary Fig. 5 All the significant ligand-receptor pairs that contribute to the signaling sending from fibroblast subpopulations to other subsets by CellChat analysis.**

**a-b** The increased ligand-receptor pairs sending from *CCL19*<sup>+</sup> FB cells **(a)** and *APCDD1*<sup>+</sup> FB cells **(b)**.

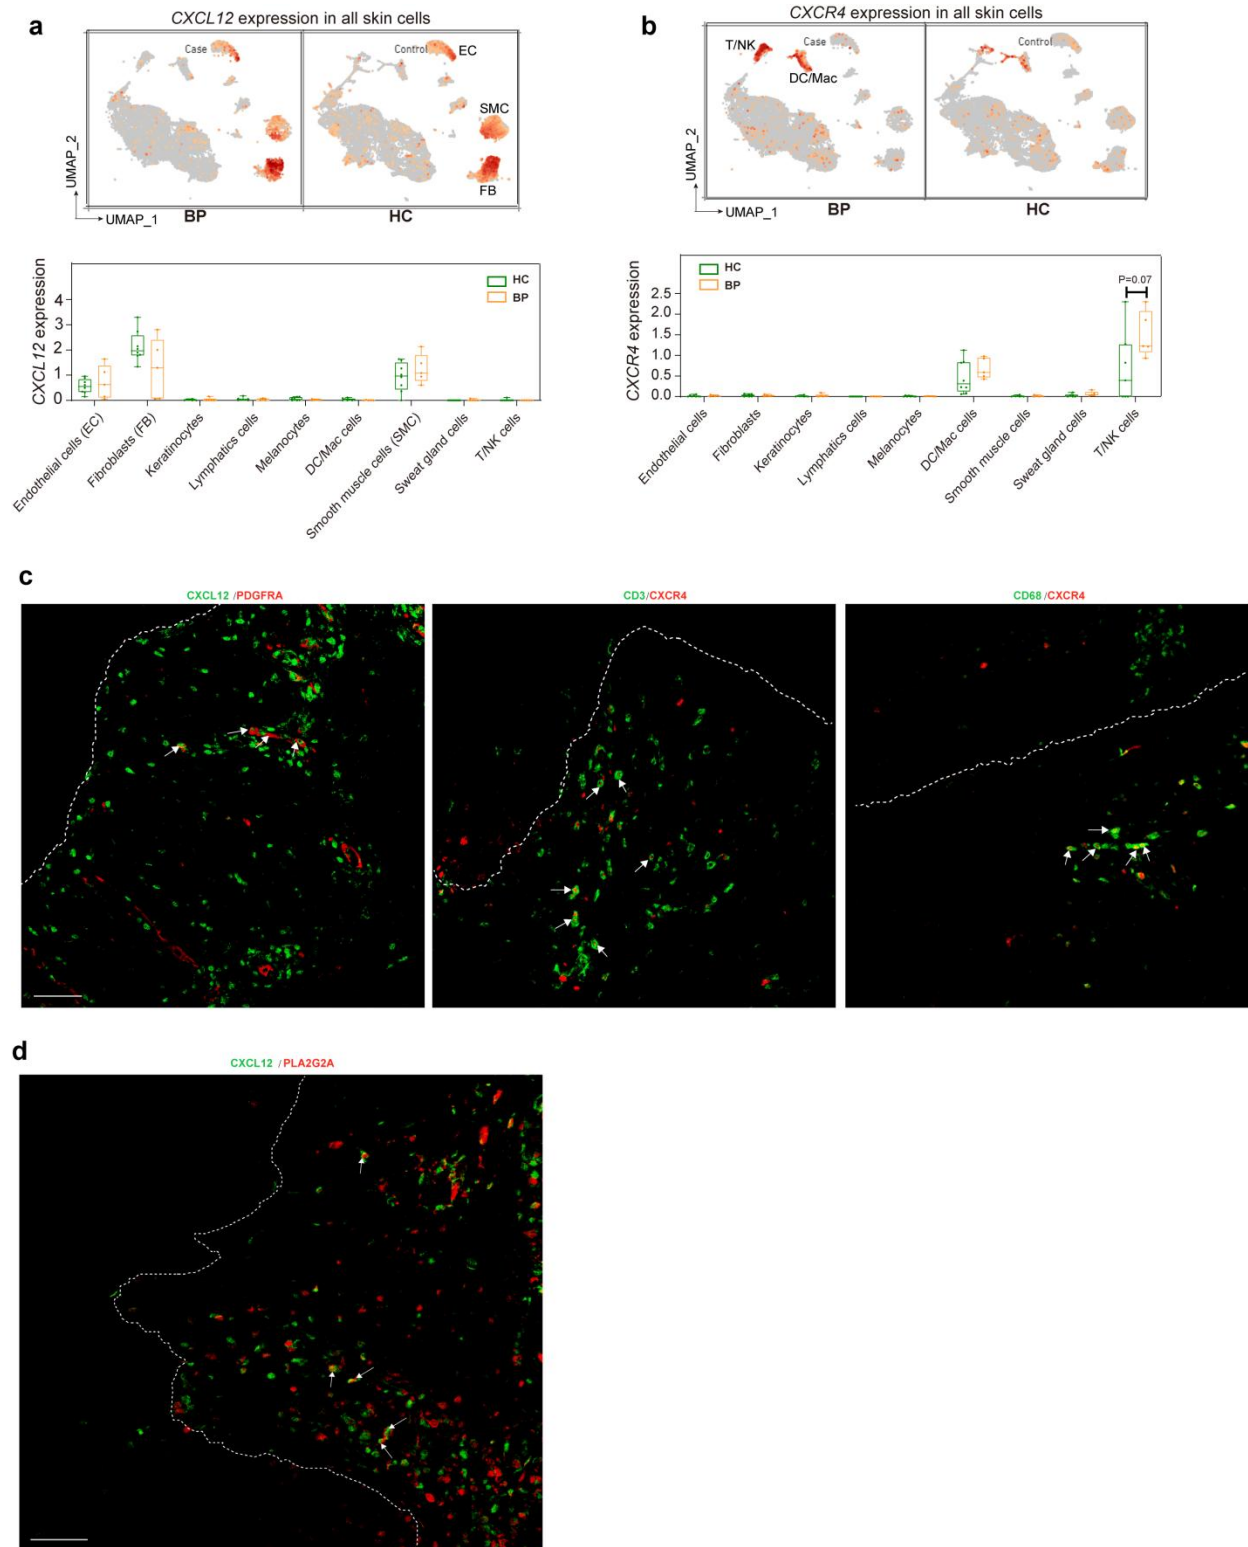

**Supplementary Fig. 6** The expression profile of *CXCL12* and *CXCR4* in skin cells.

**a-b** The feature plot and the box plot showing *CXCL12* (**a**) and *CXCR4* (**b**) mRNA expression within skin cells. BP patients (n = 5) and HC (n = 8). *P*-values were calculated using two-sided

Mann-Whitney U-test, only  $P$ -values $<0.05$  are shown. **c** Immunofluorescence co-staining showing CXCL12 expression in  $PDGFRA^+$  fibroblasts, and CXCR4 on  $CD3^+$  T cells and  $CD68^+$  macrophages, scale bar = 50  $\mu\text{m}$ . **d** Immunofluorescence co-staining showing the co-expression of CXCL12 and PLA2G2A, scale bar = 50  $\mu\text{m}$ . Data are from at least three independent experiments in **c** and **d**. In the box plot **a** and **b**: Minima: Lower limit of the whisker. Maxima: Upper limit of the whisker. Centre: Median line inside the box. The upper and lower box bounds represent the 25% and 75% percentile of data.



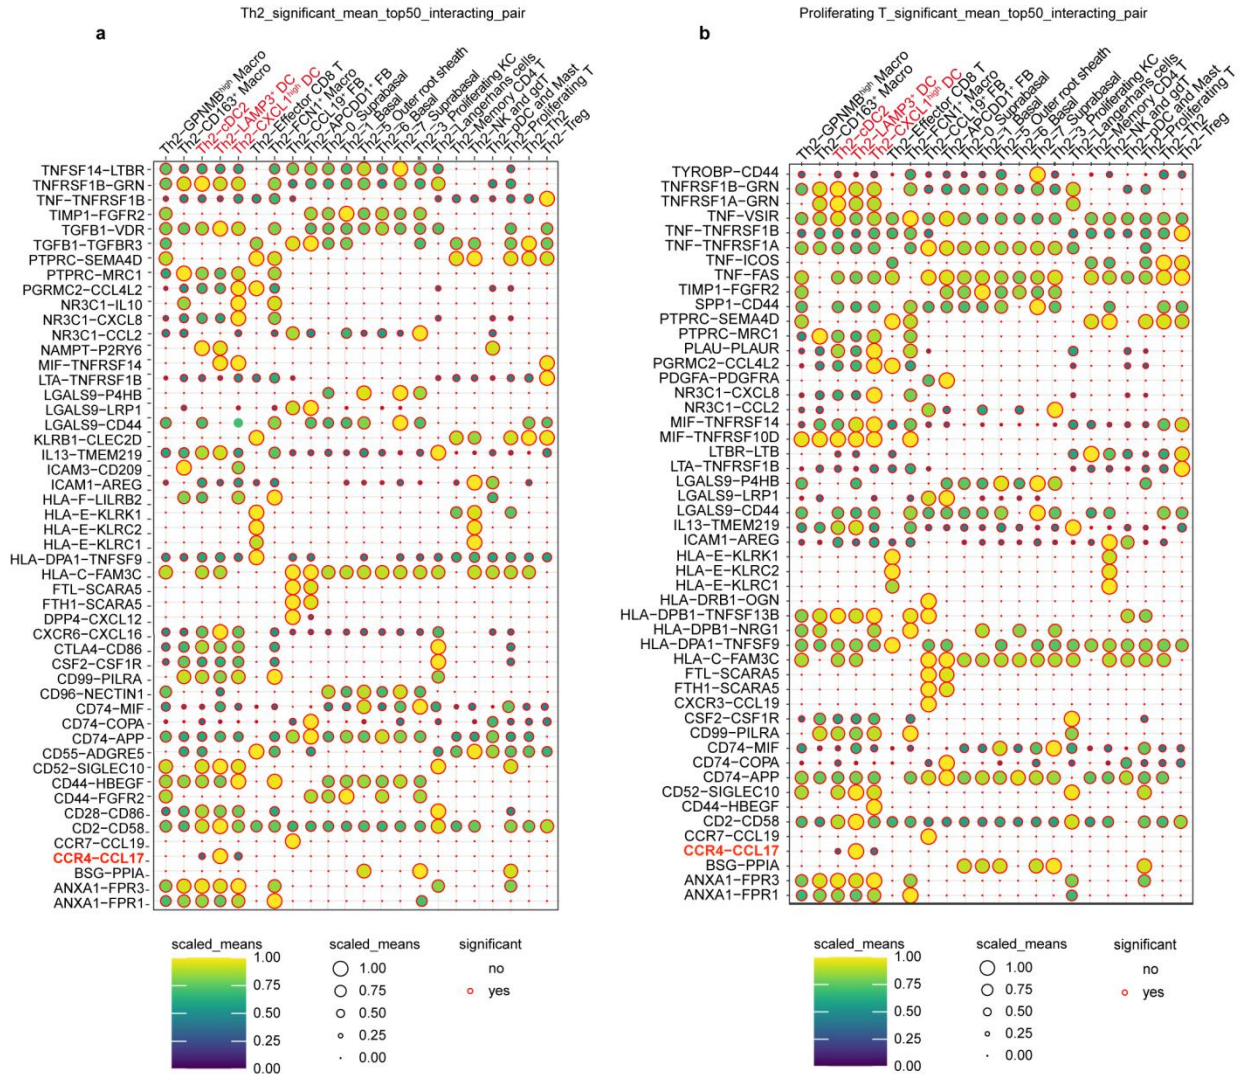

**Supplementary Fig. 7** The analysis of significant mean top50 interacting pair from Th2 and Proliferating T cells by CellPhoneDB.

**a-b** The significant mean top50 interacting pairs from Th2 (**a**) and Proliferating T cells (**b**).



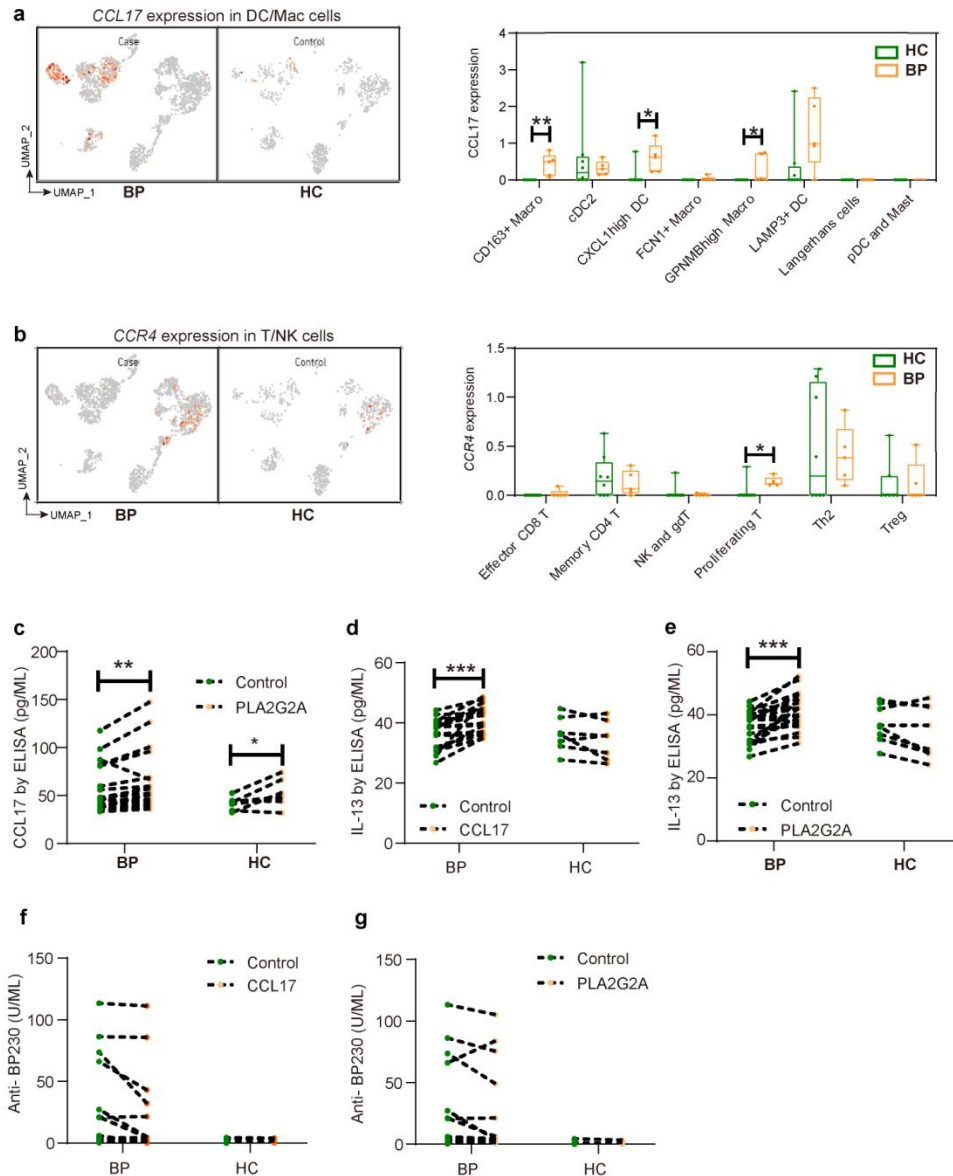

**Supplementary Fig. 8 The expression profile of *CCL17* and *CCR4* in immune cells.**

**a** The feature plot and the box plot showing *CCL17* mRNA expression within immune cells. BP patients (n = 5) and HC (n = 8). *P*-values were calculated using two-sided Mann-Whitney U-test where \*\* = *P*-value = 0.001, \* = *P*-value = 0.011 in CXCL1<sup>high</sup> DC and 0.018 in GPNMB<sup>high</sup> Macro, only *P*-values < 0.05 are shown. **b** The feature plot and the box plot showing *CCR4* mRNA expression within immune cells. BP patients (n = 5) and HC (n = 8). *P*-values were calculated using two-sided Mann-Whitney U-test where \* = *P*-value = 0.017, only *P*-values < 0.05 are shown. **c** The *CCL17* secretion by sorted DCs stimulated by PLA2G2A from both BP

patients (n = 22) and controls (n = 7). **d** The IL-13 secretion by sorted T cell stimulated by CCL17 from both BP patients (n = 21) and controls (n = 7). **e** The IL-13 secretion by sorted T cell stimulated by PLA2G2A from both BP patients (n = 22) and controls (n = 8). ELISA analysis of anti-BP230 antibody titers in supernatants of CCL17 (**f**) or PLA2G2A (**g**) stimulated PBMCs from BP patients (n = 23) and HC (n = 8). *P*-values in **c-g** were calculated using paired two-sided Student's *t*-test where \*\* = *P*-value = 0.0012 and \* = *P*-value = 0.0436 in (c), \*\*\* = *P*-value = 0.0002 in (d) and \*\*\* = *P*-value = 0.0001 in (e), only *P*-values < 0.05 are shown. In the box plot **a** and **b**: Minima: Lower limit of the whisker. Maxima: Upper limit of the whisker. Centre: Median line inside the box. The upper and lower box bounds represent the 25% and 75% percentile of data.

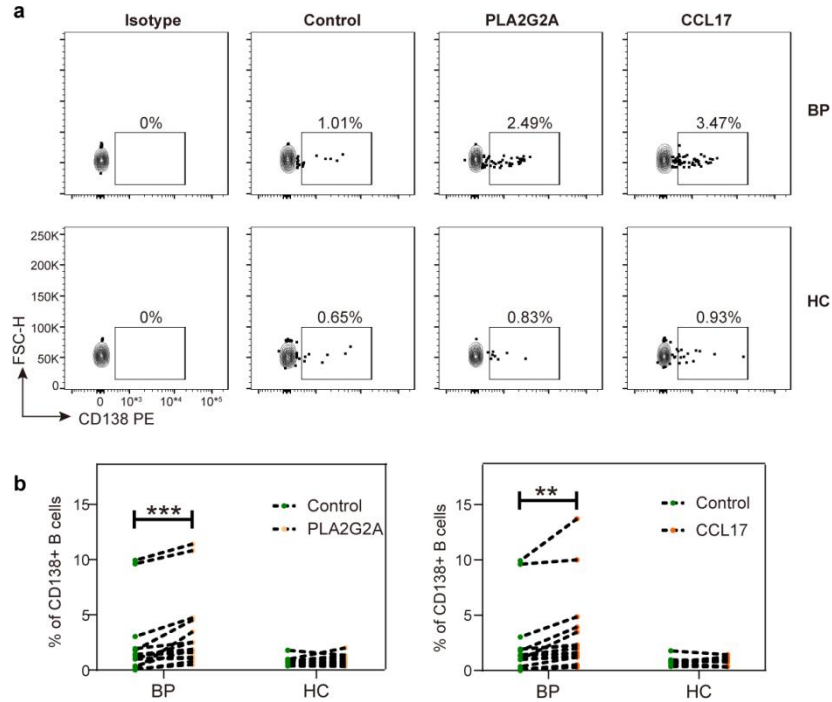

**Supplementary Fig. 9 PLA2G2A and CCL17 elevate the frequency of plasma cells.**

**a** Representative gating strategy to analyze plasma cells treated by PLA2G2A or CCL17 in the peripheral blood of BP patients and healthy controls. Plasma cells were identified as the CD138<sup>+</sup> cells gate on CD19<sup>+</sup> B cells. **b** Percentage of plasma cells in BP patients (n = 16) and HC (n = 10). *P*-values were calculated using paired two-sided Student's *t*-test where \*\*\* = *P*-value = 0.0004 in the left and \*\* = *P*-value = 0.0036 in the right, only *P*-values < 0.05 are shown.

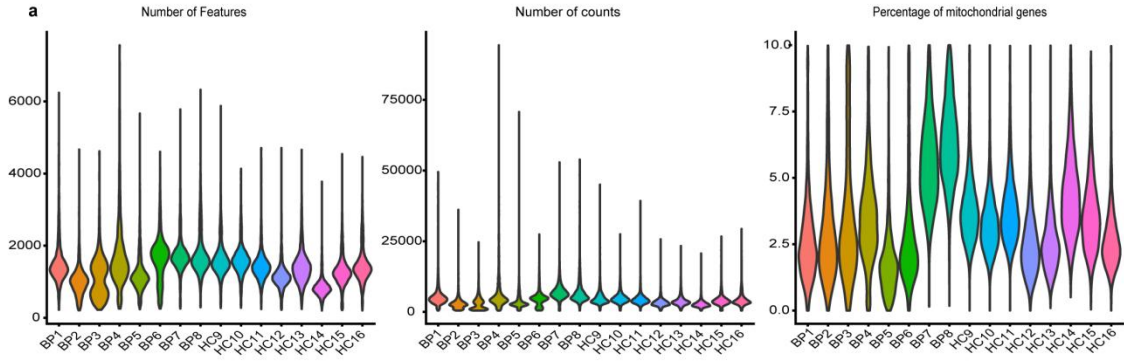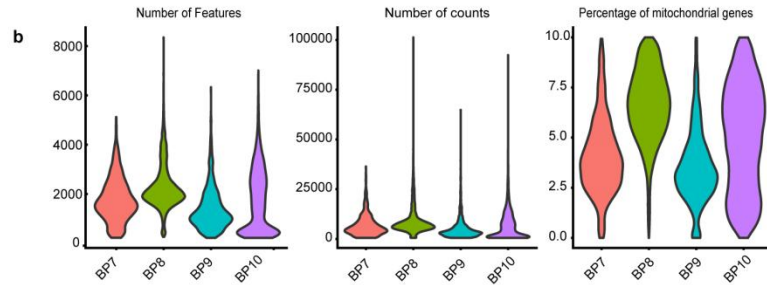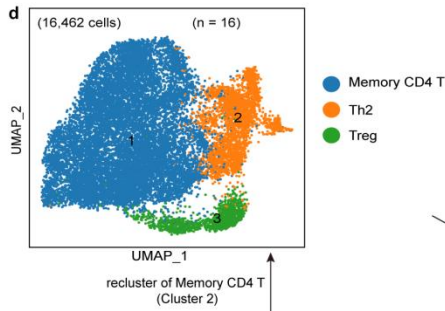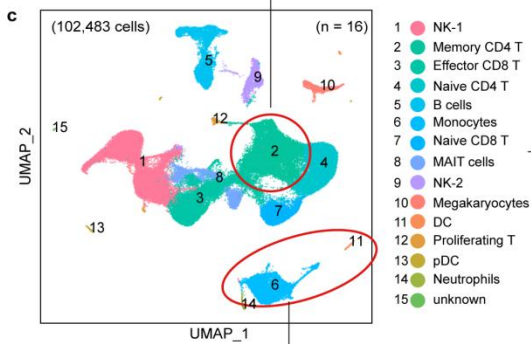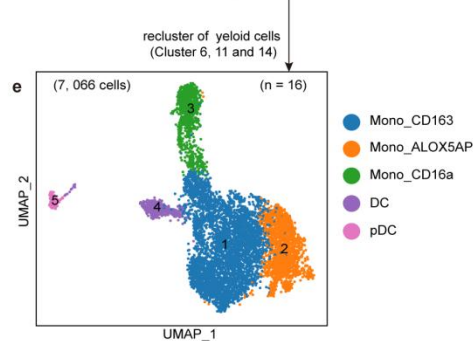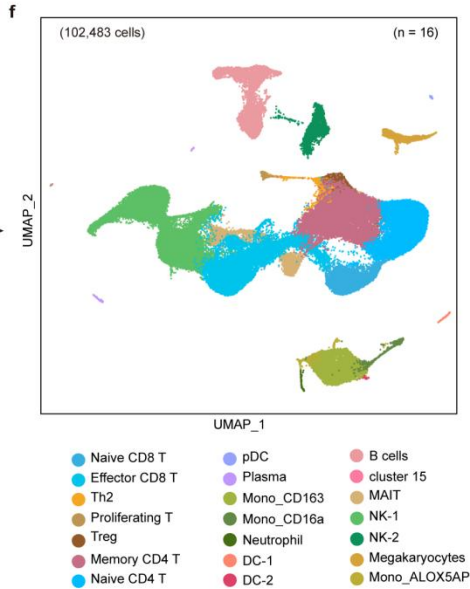

**Supplementary Fig. 10 The quality of PBMC and blister samples, as well as the identification of clusters within PBMC samples.**

**a** Violin plots illustrating the quality control metrics used in the scRNA-seq analysis for each PBMC sample's features, counts, and mitochondrial percentage per cell. **b** Violin plots illustrating the quality control metrics used in the scRNA-seq analysis for each blister sample's features, counts, and mitochondrial percentage per cell. **c** 15 clusters were revealed by PBMCs scRNA-seq data. **d** Sub-clustering of memory CD4 T cells (cluster 2). **e** Sub-clustering of myeloid cells (cluster 6, 11 and 14). **f** 21 clusters were revealed after recluster of memory CD4 T cells and myeloid cells.

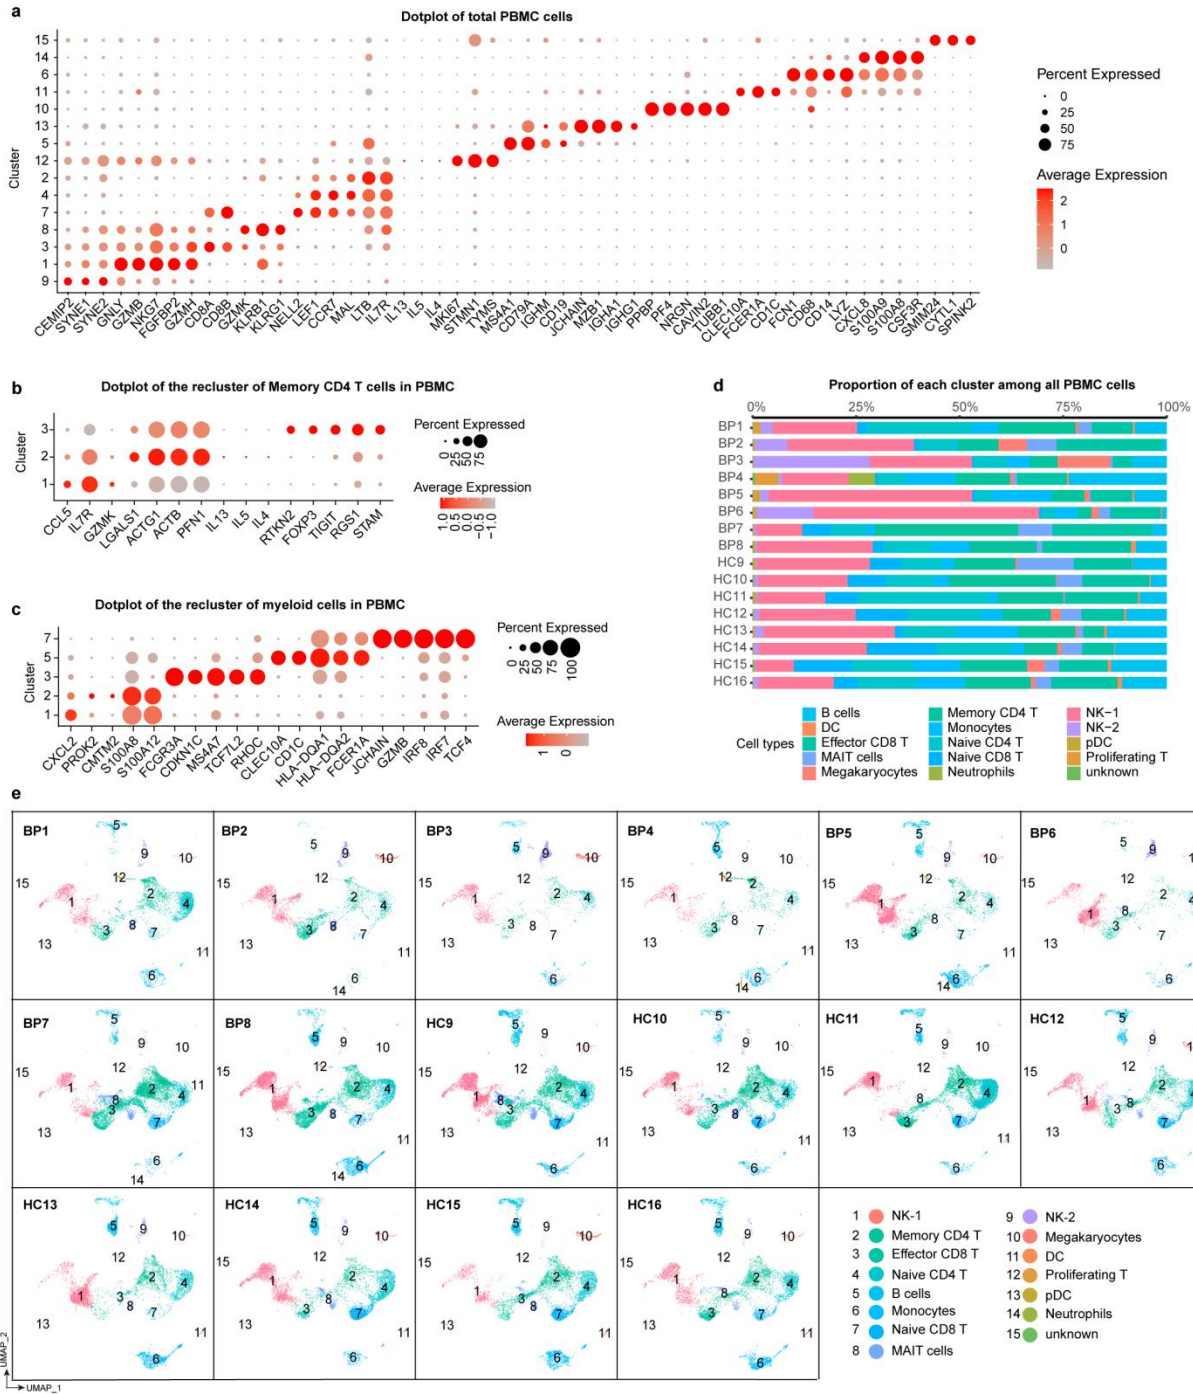

**Supplementary Fig. 11 The Dot plot of the signature genes of PBMC clusters and the distribution of clusters within the PBMC samples.**

**a** Dot plot of the signature genes of major cell types depicted in (Fig. S10c). **b** Dot plot of the signature genes of major cell types in CD4 T cells depicted in (Fig. S10d). **c** Dot plot of the signature genes of major cell types in myeloid cells depicted in (Fig. S10e). **d** Bar plots illustrate



the relative contributions of PBMC cell types in each sample. **e** UMAP plot for PBMC cells split by each sample.

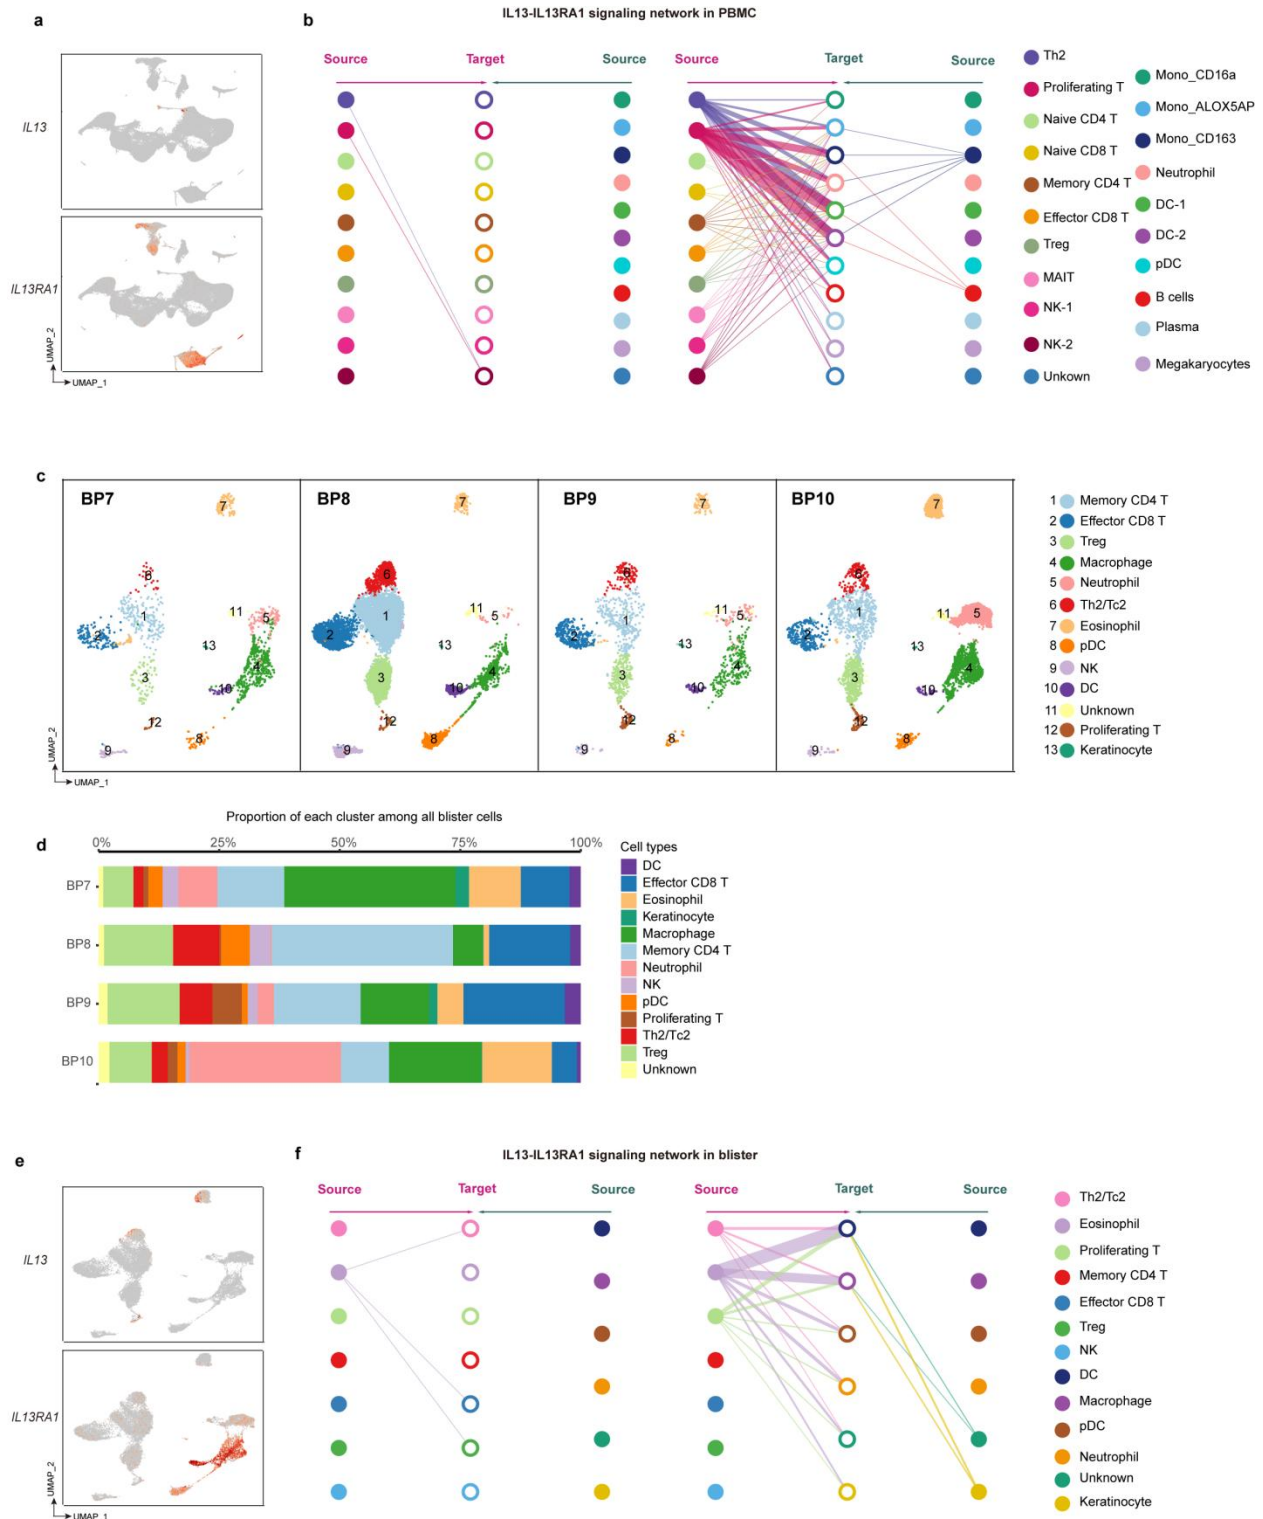

**Supplementary Fig. 12** The distribution of clusters in blister samples and the *IL13-IL13RA1* ligand-receptor pair in PBMCs and blister.

**a** UMAP plot of the expression of *IL13* and *IL13RA1* in PBMCs. **b** Hierarchical plot showing inferred intercellular communication network of *IL13-IL13RA1* signaling in PBMCs. **c** UMAP plot for blister cells split by each sample. **d** Bar plots illustrate the relative contributions of blister cell types in each patient. **e** The expression profile of *IL13* and *IL13RA1* in blister cells. **f** Hierarchical plot showing inferred intercellular communication network of *IL13-IL13RA1* signaling in blister cells.

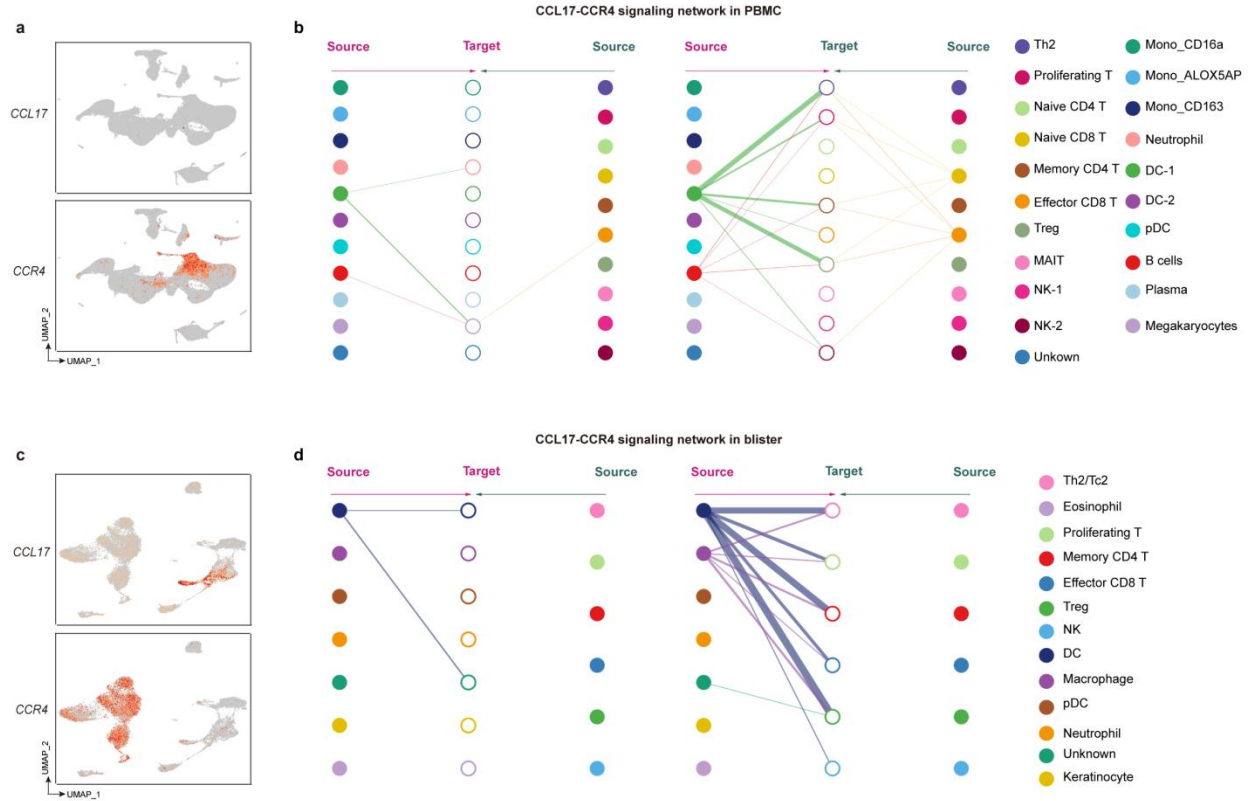

**Supplementary Fig. 13 *CCL17-CCR4* ligand-receptor pair in PBMC and blister.**

**a** UMAP plot of the expression of *CCL17* and *CCR4* in PBMCs. **b** Hierarchical plot showing inferred intercellular communication network of *CCL17-CCR4* signaling in PBMCs. **c** The expression profile of *CCL17* and *CCR4* in blister cells. **d** Hierarchical plot showing inferred intercellular communication network of *CCL17-CCR4* signaling in blister cells.

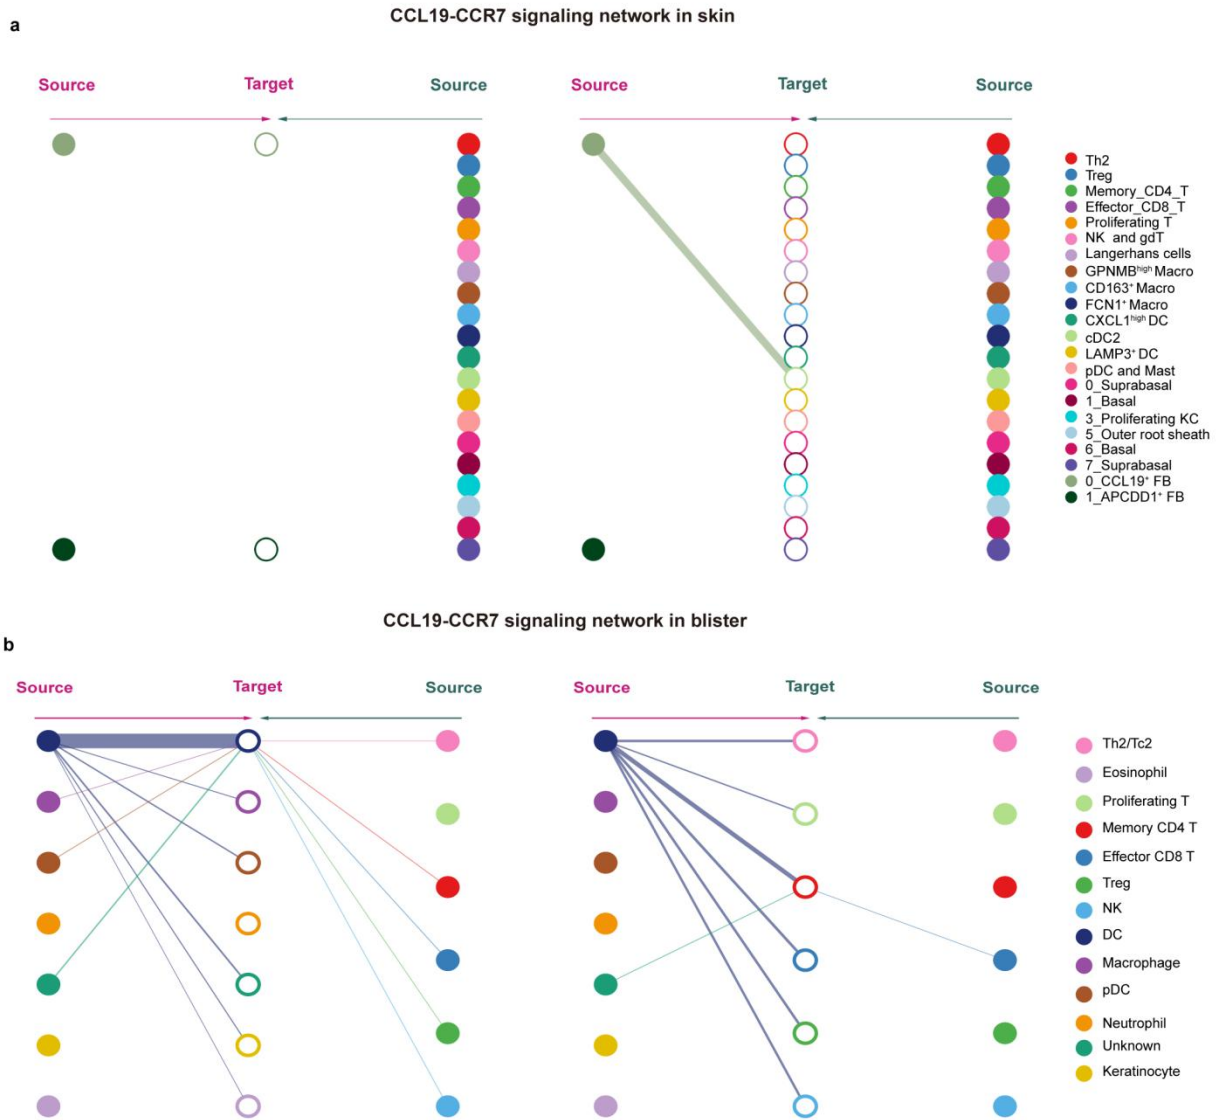

**Supplementary Fig. 14** *CCL19-CCR7* ligand-receptor pair in skin and blister samples.

**a-b** Hierarchical plot showing inferred intercellular communication network of *CCL19-CCR7* signaling in skin (**a**) and blister (**b**) samples.

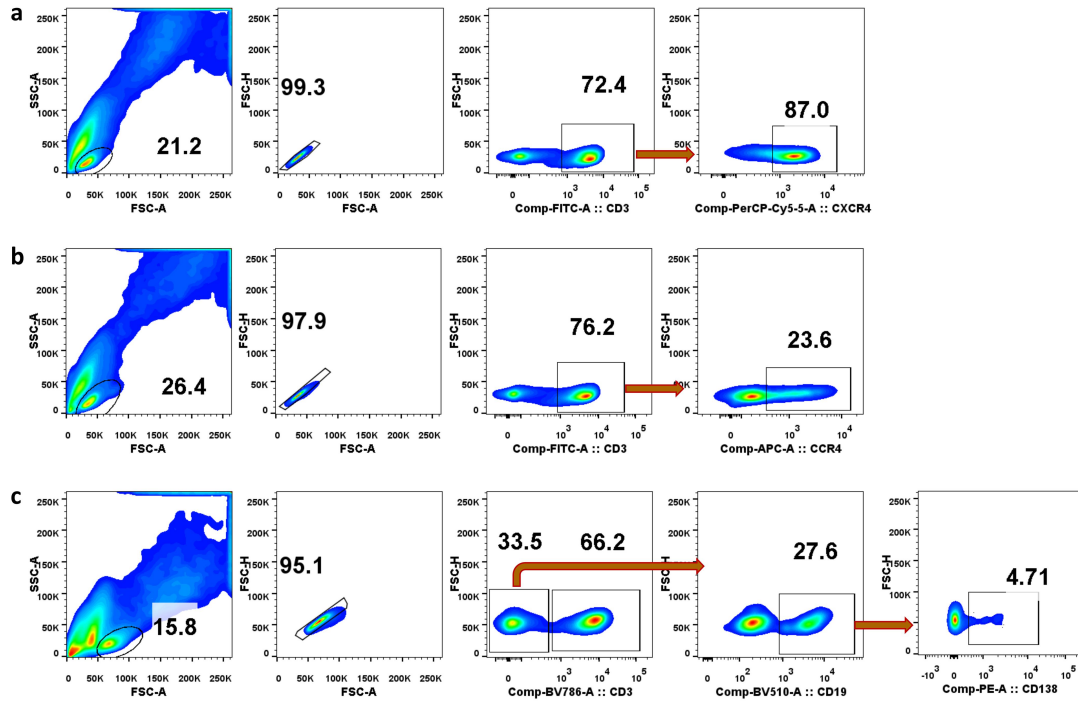

**Supplementary Fig. 15** The gating strategy of T cells and B cells to test the expression of CXCR4 (a), CCR4 (b) and CD138 (c).



**Supplementary Table 1 The sample information included in the study.**

| No.  | Sex    | Age | BP180 | BP230 | BP180/<br>BP230 | Discovery cohort |      |         | Validation cohort 1<br>(IHC, IF) | Validation cohort 2<br>(ELISA) | Validation cohort 3<br>(Flow) |
|------|--------|-----|-------|-------|-----------------|------------------|------|---------|----------------------------------|--------------------------------|-------------------------------|
|      |        |     |       |       |                 | skin             | PBMC | blister |                                  |                                |                               |
| BP1  | Male   | 81  | >200  | >200  | 1               | √                | √    |         |                                  |                                |                               |
| BP2  | Male   | 74  | >200  | 133.6 | 1.5             | √                | √    |         |                                  |                                |                               |
| BP3  | Female | 79  | 168.5 | 2.1   | 80.24           | √                | √    |         |                                  |                                |                               |
| BP4  | Male   | 70  | >200  | 0     |                 | √                | √    |         |                                  |                                |                               |
| BP5  | Male   | 73  | >200  | 155   | 1.29            | √                | √    |         |                                  |                                |                               |
| BP6  | Male   | 79  | 85.4  | 94.9  | 0.9             |                  | √    |         |                                  |                                |                               |
| BP7  | Female | 56  | >200  | 0     |                 |                  | √    | √       |                                  |                                |                               |
| BP8  | Female | 40  | >200  | 0     |                 |                  | √    | √       |                                  |                                |                               |
| BP9  | Male   | 72  | >200  | 0     |                 |                  |      | √       |                                  |                                |                               |
| BP10 | Male   | 88  | NA    | NA    |                 |                  |      | √       |                                  |                                |                               |
| BP11 | Male   | 53  | 57.2  | 0     |                 |                  |      | √       |                                  | √                              |                               |
| BP12 | Male   | 68  | >200  | 2.86  | 69.96           |                  |      | √       |                                  | √                              |                               |
| BP13 | Male   | 50  | >200  | 15.73 | 12.71           |                  |      | √       | √                                | √                              |                               |
| BP14 | Male   | 54  | 189.5 | 0     |                 |                  |      | √       |                                  | √                              |                               |
| BP15 | Female | 91  | 131.8 | 155   | 0.85            |                  |      | √       |                                  |                                |                               |
| BP16 | Male   | 82  | >200  | 94.7  | 2.11            |                  |      | √       |                                  |                                |                               |
| BP17 | Male   | 82  | >200  | 0     |                 |                  |      | √       |                                  |                                |                               |
| BP18 | Male   | 73  | >200  | 188.8 | 1.06            |                  |      | √       |                                  |                                |                               |
| BP19 | Female | 57  | >200  | 0     |                 |                  |      | √       | √                                | √                              |                               |
| BP20 | Female | 53  | >200  | 173.5 | 1.15            |                  |      | √       | √                                | √                              |                               |
| BP21 | Female | 66  | 153   | 0     |                 |                  |      | √       |                                  | √                              |                               |
| BP22 | Female | 70  | >200  | 0     |                 |                  |      | √       | √                                | √                              |                               |
| BP23 | Female | 70  | >200  | 0     |                 |                  |      |         | √                                |                                |                               |
| BP24 | Male   | 66  | >200  | >200  | 1               |                  |      |         | √                                |                                |                               |

|      |        |    |        |        |       |  |  |  |  |   |   |
|------|--------|----|--------|--------|-------|--|--|--|--|---|---|
| BP25 | Male   | 85 | >200   | >200   | 1     |  |  |  |  | √ |   |
| BP26 | Male   | 73 | >200   | 0      |       |  |  |  |  | √ |   |
| BP27 | Male   | 69 | >200   | 0      |       |  |  |  |  | √ | √ |
| BP28 | Male   | 41 | 30.79  | 47.54  | 0.65  |  |  |  |  | √ |   |
| BP29 | Male   | 63 | >200   | 142.21 | 1.41  |  |  |  |  | √ |   |
| BP30 | Male   | 60 | 145.29 | 132.73 | 1.1   |  |  |  |  | √ |   |
| BP31 | Female | 76 | 166.25 | 110.51 | 1.5   |  |  |  |  | √ |   |
| BP32 | Male   | 64 | >200   | 5.89   | 33.96 |  |  |  |  | √ |   |
| BP33 | Male   | 77 | >200   | 4.24   | 47.17 |  |  |  |  | √ |   |
| BP34 | Female | 72 | >200   | 15.89  | 12.59 |  |  |  |  | √ |   |
| BP35 | Male   | 58 | 25.7   | 138.12 | 0.19  |  |  |  |  | √ |   |
| BP36 | Male   | 76 | 87.89  | 16.07  | 5.47  |  |  |  |  | √ |   |
| BP37 | Female | 79 | 2.48   | 56.43  | 0.04  |  |  |  |  | √ |   |
| BP38 | Male   | 77 | 105.19 | 5.46   | 19.27 |  |  |  |  | √ |   |
| BP39 | Male   | 62 | 1.7    | 46.16  | 0.02  |  |  |  |  | √ |   |
| BP40 | Male   | 65 | 11.48  | 122.87 | 0.09  |  |  |  |  | √ |   |
| BP41 | Male   | 68 | >200   | 0      |       |  |  |  |  | √ |   |
| BP42 | Male   | 78 | >200   | 4.13   | 48.42 |  |  |  |  | √ |   |
| BP43 | Female | 45 | >200   | 0      |       |  |  |  |  |   | √ |
| BP44 | Male   | 72 | >200   | 0      |       |  |  |  |  |   | √ |
| BP45 | Male   | 23 | >200   | 0      |       |  |  |  |  |   | √ |
| BP46 | Male   | 79 | >200   | 80.9   | 2.47  |  |  |  |  |   | √ |
| BP47 | Male   | 36 | >200   | 0      |       |  |  |  |  |   | √ |
| BP48 | Female | 80 | >200   | 0      |       |  |  |  |  |   | √ |
| BP49 | Male   | 71 | >200   | 0      |       |  |  |  |  |   | √ |
| BP50 | Male   | 79 | >200   | 125.4  | 1.59  |  |  |  |  |   | √ |
| BP51 | Male   | 74 | >200   | 50.2   | 3.98  |  |  |  |  |   | √ |
| BP52 | Male   | 57 | >200   | 0      |       |  |  |  |  |   | √ |
| BP53 | Female | 51 | >200   | 0      |       |  |  |  |  |   | √ |
| BP54 | Female | 80 | >200   | >200   | 1     |  |  |  |  |   | √ |

|      |        |    |        |        |       |  |  |  |   |   |   |
|------|--------|----|--------|--------|-------|--|--|--|---|---|---|
| BP55 | Male   | 71 | >200   | 0      |       |  |  |  |   |   | √ |
| BP56 | Female | 71 | 157.3  | 0      |       |  |  |  |   |   | √ |
| BP57 | Male   | 64 | >200   | 0      |       |  |  |  |   |   | √ |
| BP58 | Female | 77 | >200   | >200   | 1     |  |  |  | √ |   |   |
| BP59 | Female | 78 | >200   | >200   | 1     |  |  |  | √ |   |   |
| BP60 | Male   | 80 | >200   | >200   | 1     |  |  |  | √ |   |   |
| BP61 | Male   | 53 | >200   | >200   | 1     |  |  |  | √ |   |   |
| BP62 | Male   | 72 | 0      | 148.3  | 0     |  |  |  | √ |   |   |
| BP63 | Male   | 74 | 6.4    | 20.1   | 0.32  |  |  |  | √ |   |   |
| BP64 | Male   | 75 | 19.83  | 38.97  | 0.53  |  |  |  | √ |   | √ |
| BP65 | Male   | 76 | 4.86   | 42.86  | 0.11  |  |  |  | √ |   | √ |
| BP66 | Male   | 81 | 0      | 42.3   | 0     |  |  |  | √ |   |   |
| BP67 | Female | 83 | 8.8    | 141.9  | 0.06  |  |  |  | √ | √ |   |
| BP68 | Female | 52 | 0.42   | 126.52 | 0.003 |  |  |  | √ | √ | √ |
| BP69 | Female | 71 | 6.21   | 98.24  | 0.06  |  |  |  | √ | √ | √ |
| BP70 | Female | 45 | 0      | 36.89  | 0     |  |  |  | √ | √ |   |
| BP71 | Female | 80 | >200   | >200   | 1     |  |  |  | √ |   |   |
| BP72 | Male   | 87 | 179.43 | 183.9  | 0.98  |  |  |  | √ |   |   |
| BP73 | Male   | 80 | >200   | >200   | 1     |  |  |  | √ |   |   |
| BP74 | Female | 75 | >200   | 0      |       |  |  |  | √ |   |   |
| BP75 | Female | 72 | >200   | 0      |       |  |  |  | √ |   |   |
| BP76 | Female | 16 | 0      | 55.33  | 0     |  |  |  | √ |   |   |
| BP77 | Male   | 78 | 0      | 36.99  | 0     |  |  |  |   | √ |   |
| BP78 | Male   | 73 | 16.76  | 162.15 | 0.1   |  |  |  |   | √ |   |
| BP79 | Female | 47 | 6.9    | 36.25  | 0.19  |  |  |  |   | √ | √ |
| BP80 | Male   | 49 | 0      | 73.65  | 0     |  |  |  |   | √ |   |
| BP81 | Male   | 70 | 2.16   | 133.01 | 0.016 |  |  |  |   | √ |   |
| BP82 | Female | 41 | 0      | 74.98  | 0     |  |  |  |   | √ |   |

|       |        |    |        |        |        |  |  |  |  |   |   |
|-------|--------|----|--------|--------|--------|--|--|--|--|---|---|
| BP83  | Male   | 69 | 2.52   | 86.4   | 0.03   |  |  |  |  | √ |   |
| BP84  | Male   | 84 | 0.58   | 143.81 | 0.004  |  |  |  |  | √ |   |
| BP85  | Male   | 66 | 1.91   | 27.65  | 0.07   |  |  |  |  | √ |   |
| BP86  | Male   | 77 | >200   | 4.48   | 44.64  |  |  |  |  | √ |   |
| BP87  | Female | 65 | 117.45 | 4.97   | 23.63  |  |  |  |  | √ |   |
| BP88  | Male   | 40 | 137.69 | 0.68   | 202.49 |  |  |  |  | √ | √ |
| BP89  | Male   | 45 | 137.82 | 3.16   | 43.61  |  |  |  |  | √ |   |
| BP90  | Female | 77 | 88.58  | 1.01   | 87.7   |  |  |  |  | √ | √ |
| BP91  | Female | 82 | 130.32 | 8.08   | 16.13  |  |  |  |  | √ |   |
| BP92  | Female | 76 | >200   | 10.92  | 18.32  |  |  |  |  | √ |   |
| BP93  | Female | 66 | 106.73 | 0.63   | 169.41 |  |  |  |  | √ |   |
| BP94  | Female | 82 | 199.86 | 0.93   | 214.9  |  |  |  |  | √ | √ |
| BP95  | Female | 81 | 66.91  | 1.69   | 39.59  |  |  |  |  | √ |   |
| BP96  | Male   | 77 | >200   | 0.91   | 219.78 |  |  |  |  | √ |   |
| BP97  | Female | 41 | 55.81  | 0      |        |  |  |  |  | √ |   |
| BP98  | Male   | 80 | >200   | 11.66  | 17.15  |  |  |  |  | √ |   |
| BP99  | Male   | 80 | 188.85 | 1.63   | 115.86 |  |  |  |  | √ |   |
| BP100 | Female | 86 | >200   | 17.86  | 11.2   |  |  |  |  | √ | √ |
| BP101 | Female | 66 | 30.55  | 3.1    | 9.85   |  |  |  |  | √ |   |
| BP102 | Female | 74 | 73.91  | 1.78   | 41.52  |  |  |  |  | √ |   |
| BP103 | Female | 71 | 98.45  | 1.34   | 73.47  |  |  |  |  | √ |   |
| BP104 | Female | 72 | 97.31  | 0      |        |  |  |  |  | √ |   |
| BP105 | Female | 66 | 26.25  | 3.91   | 6.71   |  |  |  |  | √ |   |
| BP106 | Female | 66 | >200   | 0      |        |  |  |  |  | √ |   |
| BP107 | Male   | 66 | 62.34  | 0.11   | 566.73 |  |  |  |  | √ |   |
| BP108 | Female | 61 | >200   | >200   | 1      |  |  |  |  | √ | √ |
| BP109 | Male   | 81 | 97.78  | 54.77  | 1.79   |  |  |  |  | √ |   |
| BP110 | Male   | 81 | 122.93 | 36.54  | 3.36   |  |  |  |  | √ |   |











|      |        |    |  |  |  |  |  |  |  |  |  |   |
|------|--------|----|--|--|--|--|--|--|--|--|--|---|
| HC94 | Female | 48 |  |  |  |  |  |  |  |  |  | √ |
| HC95 | Male   | 49 |  |  |  |  |  |  |  |  |  | √ |
| HC96 | Male   | 49 |  |  |  |  |  |  |  |  |  | √ |

**Supplementary Table 2 The detailed information of antibodies used in the study.**

| IHC/IF         |           |          |            |          |
|----------------|-----------|----------|------------|----------|
| Name           | Company   | Catolog  | Clone      | Dilution |
| CD3            | CST       | 85061S   | D7A6E      | 1/200    |
| GATA3          | CST       | 5852S    | D13C9      | 1/200    |
| PDGFR $\alpha$ | CST       | 3174S    | D1E1E      | 1/200    |
| CD68           | CST       | 76437S   | D4B9C      | 1/200    |
| IL13           | Bioss     | bs-0560R | polyclonal | 1/200    |
| CXCL12/SDF1    | CST       | 97958S   | D8G6H      | 1/200    |
| CXCR4          | CST       | 97680S   | D4Z7W      | 1/200    |
| CD11C          | CST       | 45581S   | D3V1E      | 1/200    |
| PLA2G2A        | abcam     | AB23705  | polyclonal | 1/200    |
| CD207          | CST       | 13650S   | D9H7R      | 1/200    |
| Flow cytometry |           |          |            |          |
| Name           | Company   | Catolog  | Clone      | Dilution |
| CD3            | Biologend | 317330   | OKT3       | 5ul/test |
| CD19           | Biologend | 363024   | SJ25C1     | 5ul/test |
| CD138          | Biologend | 352306   | DL-101     | 5ul/test |
| CXCR4          | Biologend | 306516   | 12G5       | 5ul/test |
| CCR4           | Biologend | 359408   | L291H4     | 5ul/test |
